# Supplementary material for: Targeted Myocardial Restoration with Injectable Hydrogels—In Search of The Holy Grail in Regenerating Damaged Heart Tissue
Source: MDPI journal article supplement (doi:10.3390/biomedicines9060595), 2021-05-24
Supplement: s1 [file s1]

### **Supplementary Figure S1: Full Search Strategy**

Keywords used in database literature searches

Concept 1: Injectable Hydrogels

- 1) Hydrogels [A1]
- 2) Extracellular matrix hydrogels [B1]
- 3) Tissue engineering [C1]

Concept 2:

- 1) Myocardial infarction [A2]

Concept 3: Myocardial restoration therapy

- 1) Myocardial infarction therapy [A3]
- 2) Cardiac stem cell therapy [B3]
- 3) Cell-based therapy [C3]

**Table S1: Number of Results Retrieved with Each Permutation of Key Words**

| Permutation                          | Key Word                                                         | Number of search results |        |                |
|--------------------------------------|------------------------------------------------------------------|--------------------------|--------|----------------|
|                                      |                                                                  | PubMed                   | Embase | Web of Science |
| A1A2                                 | Hydrogels AND Myocardial infarction                              | 453                      | 277    | 25             |
| A1A3                                 | Hydrogels AND Myocardial Infarction Therapy                      | 370                      | 158    | 1              |
| A1B3                                 | Hydrogels AND Cardiac stem cell therapy                          | 206                      | 134    | 2              |
| A1C3                                 | Hydrogels AND Cell-based therapy                                 | 455                      | 197    | 10             |
| B1A2                                 | Extracellular matrix hydrogels AND Myocardial infarction         | 78                       | 49     | 0              |
| B1A3                                 | Extracellular matrix hydrogels AND Myocardial infarction therapy | 62                       | 29     | 0              |
| B1B3                                 | Extracellular matrix hydrogels AND Cardiac stem cell therapy     | 45                       | 37     | 0              |
| B1C3                                 | Extracellular matrix hydrogels AND Cell-based therapy            | 88                       | 51     | 0              |
| C1A2                                 | Tissue engineering AND Myocardial infarction                     | 1373                     | 3189   | 25             |
| C1A3                                 | Tissue engineering AND Myocardial infarction therapy             | 933                      | 1732   | 1              |
| C1B3                                 | Tissue engineering AND Cardiac stem cell therapy                 | 1081                     | 1998   | 6              |
| C1C3                                 | Tissue engineering AND Cell-based therapy                        | 2742                     | 3139   | 32             |
| A2B3                                 | Myocardial infarction AND Cardiac stem cell therapy              | 3324                     | 4888   | 39             |
| A2C3                                 | Myocardial infarction AND Cell-based therapy                     | 619                      | 838    | 18             |
| Total Number of Results Per Database |                                                                  | 11829                    | 16716  | 159            |
| Total Number of Results              |                                                                  | 28704                    |        |                |
